# Supplementary material
Source: Springer Nature journal article supplement (https://www.springermedizin.de/resource/supplementary/13054_2010_9449_MOESM8_ESM.pdf/9706168)

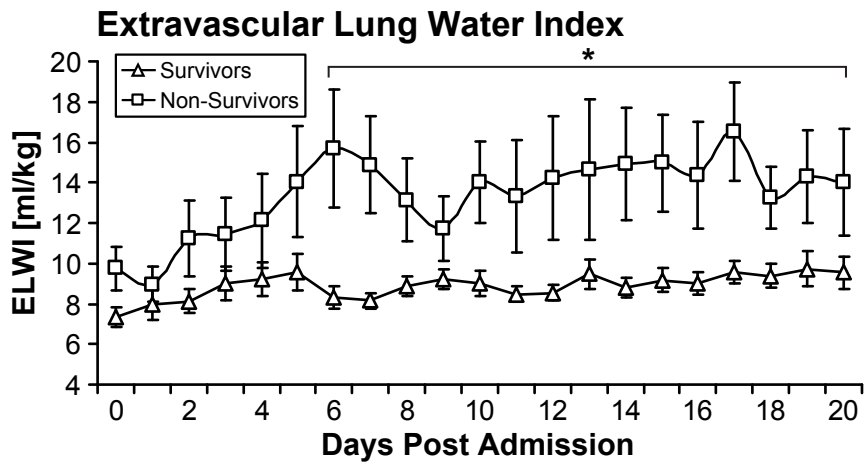

Figure 8

Supplement: MOESM8 [file 9706168]
